# Supplementary material for: Theoretical analysis of NMR shieldings in XSe and XTe (X = Si, Ge, Sn and Pb): the spin-rotation constant saga
Source: Royal Society of Chemistry journal article supplement (doi:10.1039/c5cp07025b), 2015-12-21
Supplement: c5cp07025b1.pdf [file c5cp07025b1.pdf]

## Supporting Information

# Theoretical Analysis of NMR Shieldings in XSe and XTe (X = Si, Ge, Sn and Pb): The Spin–Rotation Constant Saga

Taye Beyene Demissie

*Centre for Theoretical and Computational Chemistry,  
Department of Chemistry, UiT – The Arctic University of Norway, N-9037 Tromsø,*

### References

1. B. M. Giuliano, L. Bizzocchi, and J.-U. Grabow, *jms*, 2008, **251**, 261 – 267.
2. B. M. Giuliano, L. Bizzocchi, R. Sanchez, P. Villanueva, V. Cortijo, M. E. Sanz, and J.-U. Grabow, *J. Chem. Phys.*, 2011, **135**, 084303.
3. L. Bizzocchi, B. M. Giuliano, M. Hess, and J.-U. Grabow, *J. Chem. Phys.*, 2007, **126**, 114305.
4. B. M. Giuliano, L. Bizzocchi, S. Cooke, D. Banser, M. Hess, J. Fritzsche, and J.-U. Grabow, *Phys. Chem. Chem. Phys.*, 2008, **10**, 2078–2088.

**Table S1:** Comparison of the calculated electronic contributions to  $C$ , paramagnetic contributions to  $\sigma$ , shielding spans ( $\Omega$ ) and the perpendicular component of  $C$  for nuclei in XSe and XTe ( $X = \text{Ge}, \text{Sn}$  and  $\text{Pb}$ ) (all in ppm); BP86/cv4z using CGO for all calculations.

|                                       | NR <sup>a</sup> | SC <sup>b</sup> | DKS <sup>c</sup> | $\Delta\text{SC}$ <sup>d</sup> | $\Delta\text{SO}$ <sup>e</sup> | $\Delta\text{rel}$ <sup>f</sup> | Previous <sup>g</sup> | NR <sup>a</sup> | SC <sup>b</sup> | DKS <sup>c</sup> | $\Delta\text{SC}$ <sup>d</sup> | $\Delta\text{SO}$ <sup>e</sup> | $\Delta\text{rel}$ <sup>f</sup> | Previous <sup>g</sup> |
|---------------------------------------|-----------------|-----------------|------------------|--------------------------------|--------------------------------|---------------------------------|-----------------------|-----------------|-----------------|------------------|--------------------------------|--------------------------------|---------------------------------|-----------------------|
| Ge                                    |                 |                 |                  |                                |                                |                                 | Se                    |                 |                 |                  |                                |                                |                                 |                       |
| $C_{\parallel}^{\text{el}}$           | -4035.9         | -4201.6         | -4444.3          | -165.7                         | -242.7                         | -408.4                          | -3913                 | -4515.4         | -4793.8         | -4721.7          | -278.4                         | 72.1                           | -206.3                          | -4175                 |
| $\sigma_{\parallel}^{\text{para}}$    | -4035.9         | -3982.0         | -4267.2          | 53.9                           | -285.2                         | -231.3                          | -3993                 | -4515.4         | -4526.2         | -4489.8          | -10.8                          | 36.4                           | 25.6                            | -4212                 |
| $\sigma_{\parallel}^{\text{dia,iso}}$ | 0.0             | 220.3           | 312.8            | 220.3                          | 92.5                           | 312.8                           | 0.0                   | 0.0             | 268.0           | 347.3            | 268.0                          | 79.3                           | 347.3                           | 0.0                   |
| $\Omega$                              | 2829.8          | 2844.5          | 2844.5           | 14.7                           | 0.0                            | 14.7                            | 3134                  | 3071.6          | 3089.9          | 3089.9           | 18.3                           | 0.0                            | 18.3                            | 3439                  |
| $C_{\perp}$                           | 3938.4          | 4105.2          | 4482.9           | 166.8                          | 377.7                          | 544.5                           | 3768                  | 4421.4          | 4700.6          | 4743.5           | 279.2                          | 42.9                           | 322.1                           | 4001                  |
| $C_{\perp}$                           | -3926.6         | -4092.3         | -4335.2          | -165.7                         | -242.9                         | -408.6                          | -3694                 | -4406.9         | -4685.3         | -4613.2          | -278.4                         | 72.1                           | -206.3                          | -3967                 |
| Ge                                    |                 |                 |                  |                                |                                |                                 | Te                    |                 |                 |                  |                                |                                |                                 |                       |
| $C_{\parallel}^{\text{el}}$           | -4609.9         | -4798.0         | -5305.3          | -188.1                         | -507.3                         | -695.4                          | -4636                 | -7110.2         | -8151.7         | -7721.9          | -1041.5                        | 429.8                          | -611.7                          | -7004                 |
| $\sigma_{\parallel}^{\text{para}}$    | -4609.9         | -4578.8         | -5182.3          | 31.1                           | -603.5                         | -572.4                          | -4710                 | -7110.2         | -7039.6         | -6708.7          | 70.6                           | 330.9                          | 401.5                           | -6953                 |
| $\sigma_{\parallel}^{\text{dia,iso}}$ | 0.0             | 220.3           | 448.8            | 220.3                          | 228.5                          | 448.8                           | 0.0                   | 0.0             | 1113.4          | 1349.4           | 1113.4                         | 236.0                          | 1349.4                          | 0.0                   |
| $\Omega$                              | 2833.9          | 2848.5          | 2848.5           | 14.6                           | 0.0                            | 14.6                            | 3194                  | 5444.2          | 5521.3          | 5521.8           | 77.1                           | 0.5                            | 77.6                            | 6693                  |
| $C_{\perp}$                           | 4509.5          | 4699.1          | 5531.3           | 189.6                          | 832.2                          | 1021.8                          | 4514                  | 6999.7          | 8042.9          | 7948.1           | 1043.2                         | -94.8                          | 948.4                           | 6760                  |
| $C_{\perp}$                           | -4494.4         | -4682.5         | -5189.8          | -188.1                         | -507.3                         | -695.4                          | -4329                 | -6988.6         | -8030.1         | -7600.4          | -1041.5                        | 429.7                          | -611.8                          | -6811                 |
| Sn                                    |                 |                 |                  |                                |                                |                                 | Se                    |                 |                 |                  |                                |                                |                                 |                       |
| $C_{\parallel}^{\text{el}}$           | -6396.0         | -7127.7         | -8255.1          | -731.7                         | -1127.4                        | -1072.7                         | -7201                 | -4748.7         | -5109.9         | -4999.0          | -361.2                         | 110.9                          | -250.3                          | -4957                 |
| $\sigma_{\parallel}^{\text{para}}$    | -6396.0         | -6158.8         | -7468.7          | 237.2                          | -1309.9                        | -1072.7                         | -7368                 | -4748.7         | -4842.3         | -4821.3          | -93.6                          | 21.0                           | -72.6                           | -4976                 |
| $\sigma_{\parallel}^{\text{dia,iso}}$ | 0.0             | 970.8           | 1342.7           | 970.8                          | 371.9                          | 1342.7                          | 0.0                   | 0.0             | 268.0           | 444.8            | 268.0                          | 176.8                          | 444.8                           | 0.0                   |
| $\Omega$                              | 5169.2          | 5236.5          | 5236.8           | 67.3                           | 0.3                            | 67.6                            | 6203                  | 3078.9          | 3096.9          | 3096.9           | 18.0                           | 0.0                            | 18.0                            | 3327                  |
| $C_{\perp}$                           | 6279.6          | 7013.7          | 8695.6           | 734.1                          | 1681.9                         | 2416                            | 7163                  | 4647.4          | 5009.5          | 5165.3           | 362.1                          | 156.0                          | 517.9                           | 4672                  |
| $C_{\perp}$                           | -6271.0         | -7002.7         | -8130.2          | -731.7                         | -1127.5                        | -1859.2                         | -7000                 | -4629.7         | -4990.9         | -4880.0          | -361.2                         | 110.9                          | -250.3                          | -4674                 |
| Sn                                    |                 |                 |                  |                                |                                |                                 | Te                    |                 |                 |                  |                                |                                |                                 |                       |
| $C_{\parallel}^{\text{el}}$           | -7165.9         | -7991.1         | -9749.9          | -825.2                         | -1758.8                        | -2584                           | -7751                 | -7287.3         | -8476.2         | -7814.9          | -1188.9                        | 661.3                          | -527.6                          | -7304                 |
| $\sigma_{\parallel}^{\text{para}}$    | -7165.9         | -7023.5         | -9099.6          | 142.4                          | -2076.1                        | -1933.7                         | -7895                 | -7287.3         | -7364.6         | -6888.8          | -77.3                          | 475.8                          | 398.5                           | -7329                 |
| $\sigma_{\parallel}^{\text{dia,iso}}$ | 0.0             | 970.8           | 1699.7           | 970.8                          | 728.9                          | 1699.7                          | 0.0                   | 0.0             | 1113.4          | 1522.2           | 1113.4                         | 408.8                          | 1522.2                          | 0.0                   |
| $\Omega$                              | 5180.2          | 5247.2          | 5247.5           | 67.0                           | 0.3                            | 67.3                            | 6203                  | 5458.6          | 5535.5          | 5535.9           | 76.9                           | 0.4                            | 77.3                            | 6639                  |
| $C_{\perp}$                           | 7036.0          | 7865.1          | 10670.4          | 829.1                          | 2805.3                         | 3634.4                          | 7604                  | 7158.3          | 8349.8          | 8282.9           | 1191.5                         | -66.9                          | 1124.6                          | 7049                  |
| $C_{\perp}$                           | -7024.3         | -7849.6         | -9608.4          | -825.3                         | -1758.8                        | -2584.1                         | -7461                 | -7144.3         | -8333.2         | -7672.0          | -1188.9                        | 661.2                          | -527.7                          | -7020                 |
| Pb                                    |                 |                 |                  |                                |                                |                                 | Se                    |                 |                 |                  |                                |                                |                                 |                       |
| $C_{\parallel}^{\text{el}}$           | -10843.2        | -15087.1        | -26427.2         | -4243.9                        | -11340.1                       | -15584.0                        | 23431                 | -4880.2         | -5471.3         | -5181.3          | -591.1                         | 290.0                          | -301.1                          | 5621                  |
| $\sigma_{\parallel}^{\text{para}}$    | -10843.2        | -8552.8         | -21901.8         | 2290.4                         | -13349.0                       | -11058.6                        | -23964                | -4880.2         | -5203.0         | -5303.1          | -322.8                         | -100.1                         | -422.9                          | -5624                 |
| $\sigma_{\parallel}^{\text{dia,iso}}$ | 0.0             | 6540.6          | 9912.5           | 6540.6                         | 3371.9                         | 9912.5                          | 0.0                   | 0.0             | 268.0           | 935.9            | 268.0                          | 667.9                          | 935.9                           | 0.0                   |
| $\Omega$                              | 10156.2         | 10520.3         | 10527.0          | 364.1                          | 6.7                            | 370.8                           | 20688                 | 3086.5          | 3104.0          | 3104.0           | 17.5                           | 0.0                            | 17.5                            | 3619                  |
| $C_{\perp}$                           | 10705.4         | 14956.3         | 31678.3          | 4250.9                         | 16722                          | 20972.9                         | 23765                 | 4770.4          | 5362.1          | 6130.5           | 591.7                          | 768.4                          | 1360.1                          | 5143                  |
| $C_{\perp}$                           | -10697.9        | -14941.8        | -26281.8         | -4243.9                        | -11340                         | -15583.9                        | 23335                 | -4749.8         | -5341.0         | -5051.0          | -591.2                         | 290.0                          | -301.2                          | 5137                  |
| Pb                                    |                 |                 |                  |                                |                                |                                 | Te                    |                 |                 |                  |                                |                                |                                 |                       |
| $C_{\parallel}^{\text{el}}$           | -12065.5        | -16794.0        | -30116.5         | -4728.5                        | -13322.5                       | -18051                          | 25168                 | -7416.7         | -8952.3         | -7591.1          | -1535.6                        | 1361.2                         | -174.4                          | 7734                  |
| $\sigma_{\parallel}^{\text{para}}$    | -12065.5        | -10263.9        | -26282.2         | 1801.6                         | -16018.3                       | -14216.7                        | -25589                | -7416.7         | -7840.4         | -7106.5          | -423.7                         | 733.9                          | 310.2                           | -7736                 |
| $\sigma_{\parallel}^{\text{dia,iso}}$ | 0.0             | 6540.5          | 11692.9          | 6540.5                         | 5152.4                         | 11692.9                         | 0.0                   | 0.0             | 1113.4          | 2362.2           | 1113.4                         | 1248.8                         | 2362.2                          | 0.0                   |
| $\Omega$                              | 10176.6         | 10540.4         | 10546.8          | 363.8                          | 6.4                            | 370.2                           | 20743                 | 5475.0          | 5551.1          | 5551.5           | 76.1                           | 0.4                            | 76.5                            | 6862                  |
| $C_{\perp}$                           | 11900.0         | 16640.1         | 37812.2          | 4740.1                         | 16640.1                        | 25912.2                         | 25306                 | 7265.6          | 8804.2          | 9319.6           | 1538.6                         | 515.4                          | 2054                            | 7172                  |
| $C_{\perp}$                           | -11889.4        | -16618.0        | -29940.5         | -4728.6                        | -13322.5                       | -18051.1                        | 24854                 | -7249.2         | -8784.9         | -7423.5          | -1535.7                        | 1361.4                         | -174.3                          | 7283                  |

<sup>a</sup> NR — non-relativistically calculated results using BP86/cv4z.

<sup>b</sup> SC — results calculated without considering spin-orbit coupling using BP86/cv4z.

<sup>c</sup> DKS — full four-component relativistically calculated results using BP86/cv4z.

<sup>d</sup>  $\Delta\text{SC}$  is the scalar relativistic correction (difference between noSO and NR).

<sup>e</sup>  $\Delta\text{SO}$  is the spin-orbit relativistic correction (difference between DKS and noSO).

<sup>f</sup>  $\Delta\text{rel}$  is the total relativistic correction (difference between DKS and NR).

<sup>g</sup> In the experimental papers the isotropic values for the shielding contributions were reported, hence they are converted to the corresponding perpendicular components using  $\sigma_{\perp}^{\text{para}} = 3\sigma^{\text{para}}/2$ . The SiSe and SiTe values are taken from Ref. [1], GeSe and GeTe values from Ref. [2], SnSe and SnTe values from Ref. [3]; PbSe and PbTe values from Ref. [4].

Table S2: Comparison of the calculated shielding spans ( $\Omega$ , in ppm) of nuclei in XSe and XTe (X = Ge, Sn and Pb) molecules using different computational levels, the final total shielding spans and experimental values.

|      |    | NR <sup>a</sup> | SO-ZORA <sup>a</sup> | DKS <sup>a</sup> | $\Delta\Omega(\text{rel } 1)^b$ | $\Delta\Omega(\text{rel } 2)^c$ | CCSD(T) <sup>d</sup> | CCSD(T) <sup>e</sup> | Total 1 <sup>f</sup> | Total 2 <sup>g</sup> | Previous <sup>h</sup> |
|------|----|-----------------|----------------------|------------------|---------------------------------|---------------------------------|----------------------|----------------------|----------------------|----------------------|-----------------------|
| GeSe | Ge | 3938            | 4358                 | 4477             | 539                             | 551                             | 3498                 | 3535.5               | 4037                 | 4049                 | 3768 <sup>i</sup>     |
|      | Se | 4421            | 4739                 | 4751             | 330                             | 318                             | 4311                 | 3928.1               | 4641                 | 4629                 | 4028 <sup>i</sup>     |
| GeTe | Ge | 4510            | 5228                 | 5533             | 1023                            | 1040                            | 3957                 | 4054.6               | 4980                 | 4997                 | 4514 <sup>i</sup>     |
|      | Te | 7000            | 8076                 | 7968             | 968                             | 882                             | 6510                 | 6305.5               | 7478                 | 7392                 | 6760 <sup>i</sup>     |
| SnSe | Sn | 6280            | 8221                 | 8680             | 2400                            | 2519                            | 5522                 | 5642.7               | 7922                 | 8041                 | 7163 <sup>j</sup>     |
|      | Se | 4647            | 5163                 | 5198             | 551                             | 522                             | 4562                 | 4138.0               | 5113                 | 5084                 | 4672 <sup>j</sup>     |
| SnTe | Sn | 7036            | 9693                 | 10654            | 3618                            | 3791                            | 6129                 | 6254.7               | 9747                 | 9920                 | 7604 <sup>j</sup>     |
|      | Te | 7158            | 8424                 | 8335             | 1177                            | 1041                            | 6708                 | 6534.5               | 7885                 | 7749                 | 7049 <sup>j</sup>     |
| PbSe | Pb | 10705           | 26385                | 31532            | 20827                           | 23148                           | 9092                 | 9176.9               | 29919                | 32240                | 23765 <sup>k</sup>    |
|      | Se | 4770            | 5868                 | 6173             | 1403                            | 1467                            | 4705                 | 4389.7               | 6108                 | 6172                 | 5143 <sup>k</sup>     |
| PbTe | Pb | 11900           | 29639                | 37612            | 25712                           | 28200                           | 10014                | –                    | 35726                | 38214                | 25306 <sup>k</sup>    |
|      | Te | 7266            | 9059                 | 9375             | 2109                            | 2048                            | 6818                 | –                    | 8927                 | 8866                 | 7172 <sup>k</sup>     |

<sup>a</sup> calculated using the BP86 functional (see Table ?? for the results using the B3LYP functional).

<sup>b</sup>  $\Delta\Omega(\text{rel } 1)$  is the difference between DKS and NR results using BP86/cv4z (relativistic corrections).

<sup>c</sup>  $\Delta\Omega(\text{rel } 2)$  is the difference between DKS and NR results using B3LYP/cv4z (relativistic corrections).

<sup>d</sup> the unc-DZP-DKH basis set was used.

<sup>e</sup> the unc-ANO-RCC basis set was used.

<sup>f</sup> Total 1 is the sum of the CCSD(T) results and  $\Delta\Omega(\text{rel } 1)$  from BP86/cv4z, absolute values.

<sup>g</sup> Total 2 is the sum of the CCSD(T) results and  $\Delta\Omega(\text{rel } 2)$  from B3LYP/cv4z, absolute values.

<sup>h</sup> Estimated from experimental spin-rotation constants.

<sup>i</sup> Taken from Ref. [2]

<sup>j</sup> Taken from Ref. [3]

<sup>k</sup> Taken from Ref. [4]
